# Supplementary material for: Parasitic contamination in vegetables for human consumption: a systematic review and meta-analysis
Source: PubMed Central journal article supplement (PMC11452068; doi:10.1590/s1984-29612024040), 2024-09-06

Figure S1: Fixed and Random Effects Models applied to systematic review studies.

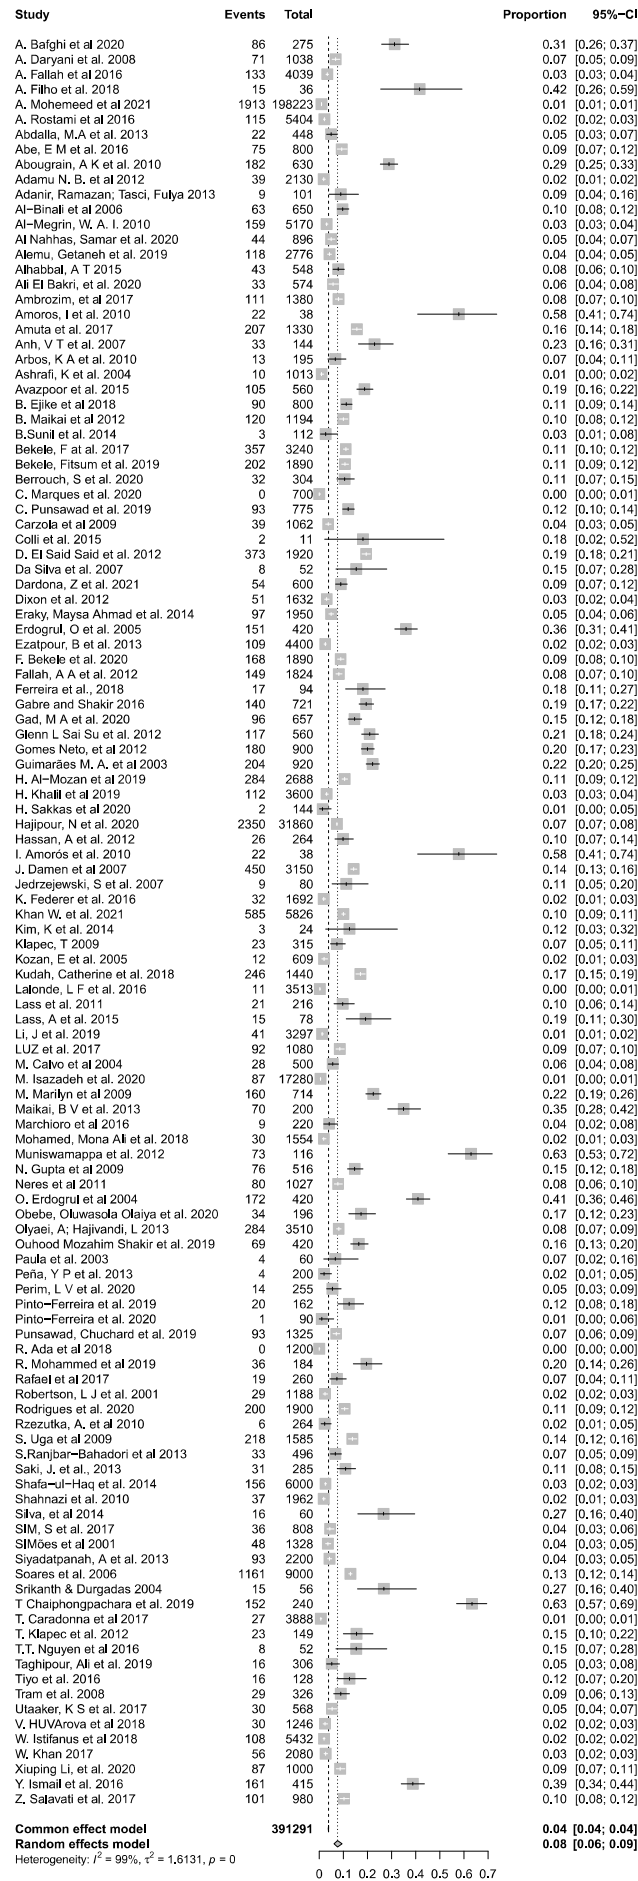

Supplement: rbpv-33-3-e002824-Suppl-FigS01.pdf [file rbpv-33-3-e002824-Suppl-FigS01.pdf]
